# Supplementary material for: The prevalence and impact of comorbidities on patients with axial spondyloarthritis: results from a nationwide population-based study
Source: PubMed Central journal article supplement (PMC7488243; doi:10.1186/s13075-020-02301-0), 2020-09-10
Supplement: 13075_2020_2301_MOESM1_ESM.pdf [file 13075_2020_2301_MOESM1_ESM.pdf]

**Supplementary table 1** A univariable association of comorbidities\* with disease activity and functional impairment in patients with axial spondyloarthritis (N=1,776)

|                                | Reference   | BASDAI<br>β (95% CI) | BASFI<br>β (95% CI) |
|--------------------------------|-------------|----------------------|---------------------|
| Hypertension (complicated)     | not present | 0.41 (0.04, 0.77)    | 1.08 (0.60, 1.56)   |
| Hypertension (uncomplicated)   | not present | 0.42 (0.23, 0.61)    | 1.15 (0.92, 1.39)   |
| Depression                     | not present | 1.14 (0.93, 1.35)    | 1.12 (0.85, 1.38)   |
| Chronic pulmonary disease      | not present | 0.46 (0.22, 0.69)    | 0.79 (0.51, 1.08)   |
| Diabetes (complicated)         | not present | 0.47 (0.12, 0.82)    | 1.32 (0.90, 1.75)   |
| Diabetes (uncomplicated)       | not present | 0.25 (-0.13, 0.62)   | 0.92 (0.46, 1.38)   |
| Cardiac arrhythmias            | not present | 0.23 (-0.05, 0.51)   | 0.79 (0.44, 1.15)   |
| Obesity                        | not present | 0.61 (0.34, 0.88)    | 1.37 (1.04, 1.71)   |
| Hypothyroidism                 | not present | 0.31 (0.03, 0.59)    | 0.35 (0.00, 0.71)   |
| Osteoporosis                   | not present | 0.14 (-0.16, 0.44)   | 0.78 (0.44, 1.13)   |
| Liver disease                  | not present | 0.52 (0.23, 0.81)    | 0.59 (0.23, 0.95)   |
| Peripheral vascular disorders  | not present | 0.39 (0.04, 0.73)    | 1.29 (0.85, 1.74)   |
| Solid tumor without metastasis | not present | -0.09 (-0.41, 0.24)  | 0.63 (0.21, 1.05)   |
| Valvular disease               | not present | 0.42 (0.08, 0.76)    | 0.39 (-0.03, 0.81)  |
| Renal failure                  | not present | 0.26 (-0.11, 0.64)   | 1.09 (0.63, 1.56)   |
| Congestive heart failure       | not present | 0.49 (0.09, 0.89)    | 1.83 (1.34, 2.33)   |
| Deficiency anemia              | not present | 0.28 (-0.16, 0.73)   | 0.37 (-0.20, 0.94)  |

\* with prevalence >5%.

BASDAI, Bath Ankylosing Spondylitis Disease Activity Index; BASFI, Bath Ankylosing Spondylitis Functional Index.
