# Supplementary material for: The prevalence and impact of comorbidities on patients with axial spondyloarthritis: results from a nationwide population-based study
Source: PubMed Central journal article supplement (PMC7488243; doi:10.1186/s13075-020-02301-0), 2020-09-10
Supplement: 13075_2020_2301_MOESM2_ESM.pdf [file 13075_2020_2301_MOESM2_ESM.pdf]

**Supplementary table 2** Association of depression, chronic pulmonary disease and hypertension\* with disease activity and functional impairment in a multivariable analysis in patients with axial spondyloarthritis (N=1,776)

|                              | Reference    | BASDAI<br>β (95% CI) | BASFI<br>β (95% CI) |
|------------------------------|--------------|----------------------|---------------------|
| Depression                   | not present  | 0.52 (0.26, 0.79)    | 0.59 (0.27, 0.92)   |
| Chronic pulmonary disease    | not present  | 0.21 (-0.10, 0.52)   | 0.26 (-0.11, 0.62)  |
| Hypertension (complicated)   | not present  |                      | 0.40 (-0.11, 0.90)  |
| Hypertension (uncomplicated) | not present  |                      | 0.38 (0.11, 0.65)   |
| Age                          | per 10 years | 0.14 (0.06, 0.21)    | 0.50 (0.41, 0.59)   |
| Sex                          | male         | 0.55 (0.37, 0.74)    | 0.00 (-0.22, 0.22)  |
| In rheumatologic care        | no           |                      | 0.61 (0.38, 0.84)   |
| Body mass index              | per unit     | 0.03 (0.01, 0.05)    | 0.07 (0.05, 0.10)   |
| Smoking (current)            | no           | 0.28 (0.03, 0.52)    | 0.52 (0.26, 0.78)   |
| Suffering from stress        | no           | 0.73 (0.54, 0.93)    |                     |
| Lack of exercise             | no           |                      | 0.62 (0.36, 0.87)   |
| Household income (€)         |              |                      |                     |
| <1500                        | >3200        | 0.80 (0.53, 1.08)    | 1.08 (0.76, 1.40)   |
| 1500-3200                    | >3200        | 0.53 (0.29, 0.76)    | 0.49 (0.24, 0.75)   |
| NSAIDs                       | no           | 0.47 (0.27, 0.66)    |                     |
| bDMARDs                      | no           | -0.28 (-0.54, -0.02) |                     |
| Non-opioid analgesics        | no           | 0.37 (0.15, 0.60)    | 0.43 (0.16, 0.71)   |
| Opioids                      | no           | 0.99 (0.73, 1.26)    | 1.63 (1.30, 1.95)   |
| Steroids                     | no           | 0.33 (0.09, 0.56)    | 0.26 (-0.01, 0.54)  |
| Physical therapy             | no           | 0.35 (0.17, 0.54)    | 0.33 (0.12, 0.55)   |

\*All comorbidities were only assumed to be present if indicative medications were prescribed.

BASDAI, Bath Ankylosing Spondylitis Disease Activity Index; BASFI, Bath Ankylosing Spondylitis Functional Index; bDMARDs, biological disease-modifying anti-rheumatic drugs; NSAIDs, non-steroidal anti-inflammatory drugs.
